# Supplementary material for: Circular RNA CircCDKN2B−AS_006 Promotes the Tumor-like Growth and Metastasis of Rheumatoid Arthritis Synovial Fibroblasts by Targeting the miR−1258/RUNX1 Axis
Source: MDPI journal article supplement (doi:10.3390/ijms24065880), 2023-03-20
Supplement: s1 [file s1]

### Supplementary figure legends

**Figure. S1** CircCDKN2B-AS\_006 promotes the proliferation, migration, and invasion of MH7A cells *in vitro*. **A**. The growth curves of cells were evaluated by CCK-8 assays after knocking down and overexpressing circCDKN2B-AS\_006 in MH7A cells. **B** and **E**. EdU assays showing that knockdown of circCDKN2B-AS\_006 inhibited the DNA synthesis of MH7A cells, while overexpression of circCDKN2B-AS\_006 promoted DNA synthesis in MH7A cells. **C-D** and **F**. Transwell assays were performed to assess the migration and invasion abilities of MH7A cells. The samples were imaged at 100× magnification. The samples were imaged at 100× magnification.  $**P < 0.01$ .

**Figure. S2** MiR-1258 inhibits the proliferation, migration, and invasion of RASFs *in vitro*. **A**. The growth curves of cells were evaluated by CCK-8 assays in RASFs after transfection with miR-1258 mimics or inhibitor. **B** and **E**. EdU assays showing that miR-1258 mimics inhibited the DNA synthesis, while miR-1258 inhibitor promoted DNA synthesis in RASFs. **C-D** and **F**. Transwell assays were performed to assess the migration and invasion abilities of RASFs. The samples were imaged at 100× magnification.  $**P < 0.01$ .

**Figure. S3** MiR-1258 inhibits the proliferation, migration, and invasion of MH7A cells *in vitro*. **A**. The growth curves of cells were evaluated by CCK-8 assays in MH7A cells after transfection with miR-1258 mimics or inhibitor. **B** and **E**. EdU assays showing that miR-1258 mimics inhibited the DNA synthesis, while miR-1258 inhibitor promoted DNA synthesis in MH7A cells. **C-D** and **F**. Transwell assays were performed to assess the migration and invasion abilities of MH7A cells. The samples were imaged at 100× magnification.  $**P < 0.01$ .

**Figure. S4** MiR-1258 reverses circCDKN2B-AS\_006-promoted cell proliferation, migration, and invasion of MH7A cells. **A-B** and **E**. The cell proliferation were determined after transfection with sh-circCDKN2B-AS\_006 and miR-1258 inhibitor

by CCK-8 (A) and EdU assays (B and E). **C-D** and **F**. The cell migration and invasion were determined after transfection with sh-circCDKN2B-AS\_006 and miR-1258 inhibitor by transwell assays.  $**P < 0.01$ .

**Figure. S5** CircCDKN2B-AS\_006 promotes MH7A cells proliferation, migration and invasion via the miR-1258/RUNX1 axis. **A-B** and **E**. The cell proliferation were determined after transfection with sh-circCDKN2B-AS\_006 and RUNX1 overexpression by CCK-8 (A) and EdU assays (B and E). **C-D** and **F**. The cell migration and invasion were determined after transfection with sh-circCDKN2B-AS\_006 and RUNX1 overexpression by transwell assays.  $**P < 0.01$ .

**Figure. S6** Bioinformatics analysis identified the potential relationship between RUNX1 with EMT process and Wnt signaling pathway in the synovium from RA patients. **A**. Relationship of ECM receptor interaction, adherens junction, and TGF- $\beta$  signaling pathway with RUNX1 expression was shown using GSE77298. **B**. Relationship of focal adhesion, ECM receptor interaction, and Wnt signaling pathway with RUNX1 expression was shown using GSE55235. **C**. Relationship of ECM receptor interaction with RUNX1 expression was shown using GSE55584. **D**. Functional enrichment analysis of genes with RUNX1 transcription factor binding sites from the TRANSFAC Predicted Transcription Factor Targets database was assessed by KEGG pathway. **E**. Upset Venn diagram was used to identify the overlapped genes among the KEGG pathways related to EMT process, Wnt/ $\beta$ -catenin pathway, and cancer. **F**. Correlation analysis between RUNX1 and CTNNB1 expression in the synovium from RA patients in the gene expression microarray dataset (GSE55235).
