# Supplementary material for: Circular RNA CircCDKN2B−AS_006 Promotes the Tumor-like Growth and Metastasis of Rheumatoid Arthritis Synovial Fibroblasts by Targeting the miR−1258/RUNX1 Axis
Source: MDPI journal article supplement (doi:10.3390/ijms24065880), 2023-03-20
Supplement: s1 [file s1]

**Table S2. The sequences of primers used in this study.**

| <b>Gene</b>               | <b>Sequence (5'-3')</b> |
|---------------------------|-------------------------|
| circCDKN2B-AS_006 Forward | TGGAGAAGACACTGGAGTGTC   |
| circCDKN2B-AS_006 Reverse | TGAACCCTCTCTTTCCAAGA    |
| CDKN2B-AS_006 Forward     | TACAGGTGTGAGACACCACA    |
| CDKN2B-AS_006 Reverse     | TTCCCTGGTGTGTCCTTCAT    |
| GAPDH Forward             | GGAGCGAGATCCCTCCAAAAT   |
| GAPDH Reverse             | GGCTGTTGTCATACTTCTCATGG |
| divergent GAPDH Forward   | GAAGGTGAAGGTCGAGTC      |
| divergent GAPDH Reverse   | GAAGATGGTGATGGGATTTC    |
| RUNX1 Forward             | CGAAGACATCGGCAGAACT     |
| RUNX1 Reverse             | TAAAGGCAGTGGAGTGGTTCA   |
