# Supplementary material for: Circular RNA CircCDKN2B−AS_006 Promotes the Tumor-like Growth and Metastasis of Rheumatoid Arthritis Synovial Fibroblasts by Targeting the miR−1258/RUNX1 Axis
Source: MDPI journal article supplement (doi:10.3390/ijms24065880), 2023-03-20
Supplement: s1 [file s1]

**Table S1. The sequences of oligonucleotides and probes used in this study.**

|                                       |                           |
|---------------------------------------|---------------------------|
| <b>miR-1258 mimics and inhibitors</b> |                           |
| mimics NC sense                       | UUCUCCGAACGUGUCACGUTT     |
| mimics NC antisense                   | ACGUGACACGUUCGGAGAATT     |
| miR-1258 mimics sense                 | AGUUAGGAUUAGGUCGUGGAA     |
| miR-1258 mimics antisense             | CCACGACCUGAAUCCUAACUUU    |
| inhibitor NC                          | CAGUACUUUUGUGUAGUCAA      |
| miR-1258 inhibitor                    | UUCCACGACCUGAAUCCUAACU    |
| <b>FISH Probes</b>                    |                           |
| Cy3-circCDKN2B-AS_006 probe           | TCTCATCAAAAGGGACACTCCAGTG |
| FAM-miR-1258 probe                    | TTCCACGACCTAATCCTAACT     |
| <b>Biotinylated probes</b>            |                           |
| Biotin-miR-1258 NC                    | TTCCACGACCTAATCCTAACT     |
| Biotin-miR-1258                       | AGTTAGGATTAGGTCGTGGAA     |
| <b>shRNAs</b>                         |                           |
| sh-circCDKN2B-AS NC (sh NC)           | TTCTCCGAACGTGTCACGT       |
| sh-circCDKN2B-AS                      | AGAAGACACTGGAGTGTCC       |
| shRUNX1 NC                            | CCTAAGGTTAAGTCGCCCTCG     |
| shRUNX1                               | GGCAGAACTAGATGATCA        |
