# Supplementary material for: Circular RNA CircCDKN2B−AS_006 Promotes the Tumor-like Growth and Metastasis of Rheumatoid Arthritis Synovial Fibroblasts by Targeting the miR−1258/RUNX1 Axis
Source: Int J Mol Sci. 2023 Mar 20;24(6):5880. doi: 10.3390/ijms24065880 (PMC10051600; doi:10.3390/ijms24065880)
Supplement: Supplementary file 1 [file ijms-24-05880-s001.zip]

Archive with 9 entries (9 files):
- Figure S1.tif
- Figure S2.tif
- Figure S3.tif
- Figure S4.tif
- Figure S5.tif
- Figure S6.tif
- Supplementary figure legends.pdf
- Supplementary table S1.pdf
- Supplementary table S2.pdf
